# Supplementary material
Source: publisher figshare collection journal article supplement (https://tandf.figshare.com/ndownloader/files/21740238)
Supplement: Supplementary file 1 [file 21740238]

**Supplementary Figure**

**
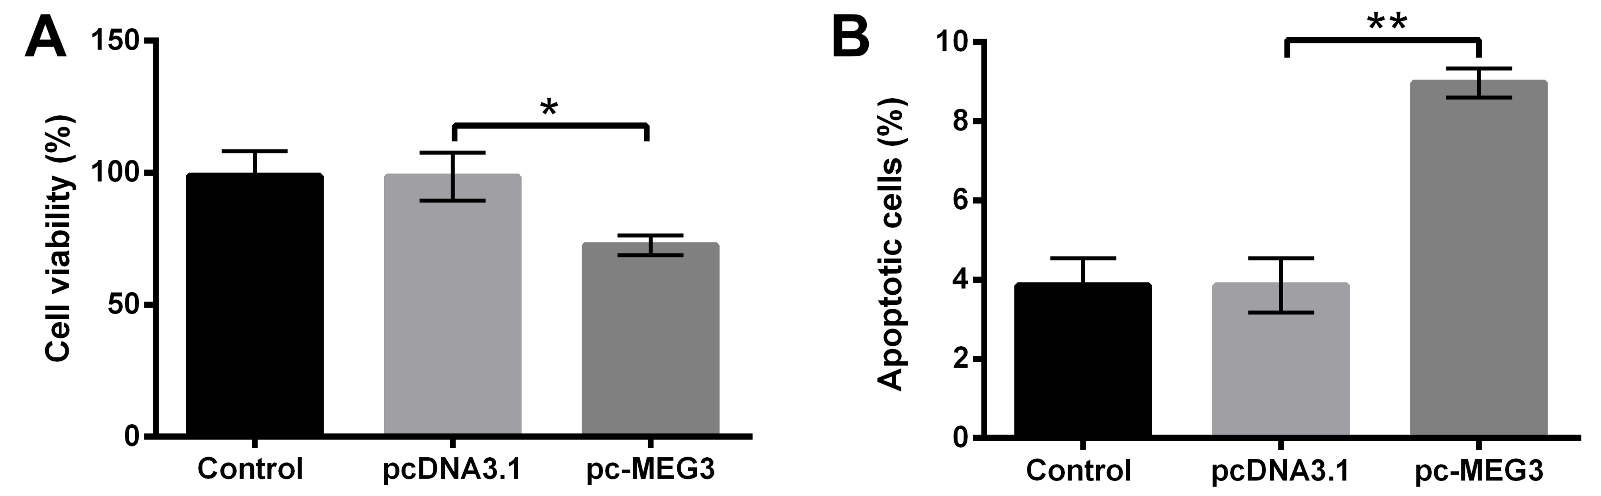
**

**Supplementary Figure 1. Overexpressed MEG3 prohibited PC-12 cells growth**

PC-12 cells were received pc-MEG3 and pcDNA3.1 transfection, CCK-8 and flow cytometry were then performed to survey (A) cell viability and (B) apoptosis.

**P* < 0.05, ***P* < 0.01.
